# Supplementary material
Source: ML conference proceedings conference paper supplement (https://openreview.net/forum?id=DQqdjPcE6g)
Supplement: supplementary_material [file attachment]

## Supplementary Material

We selected the ResNet-34 for demonstrating our results and we have reported explanations from all four explainer in Figure 1 and 2.

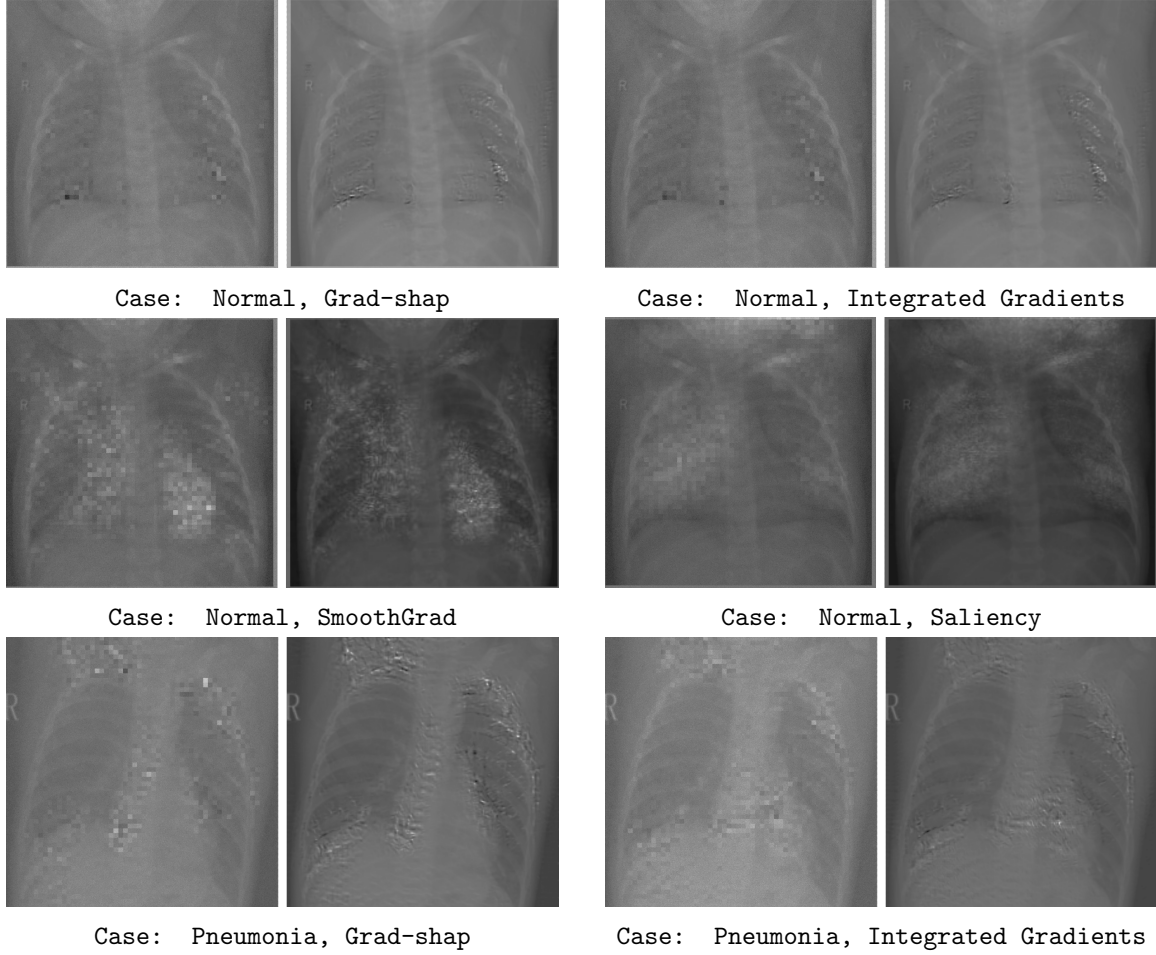

Figure 1: For each plot, LDP explanation is on **Left** and Vanilla explanation is on **Right**

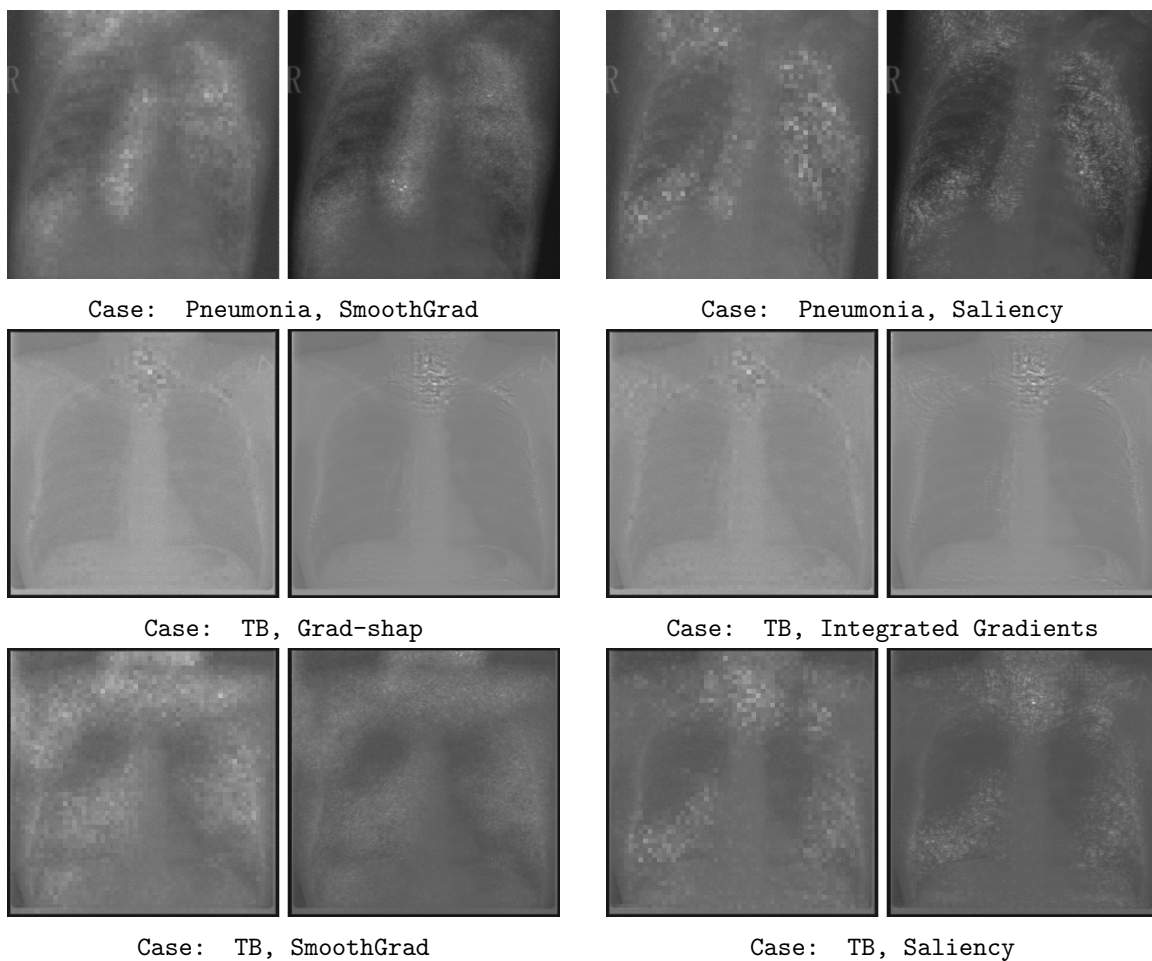

Figure 2: For each plot, LDP explanation is on **Left** and Vanilla explanation is on **Right**
